# Supplementary material for: Risk of Dengue for Tourists and Teams during the World Cup 2014 in Brazil
Source: PubMed Central journal article supplement (PMC4120682; doi:10.1371/journal.pntd.0003063), 2014-07-31
Supplement: pntd.0003063.s001.pdf [file pntd.0003063.s001.pdf]

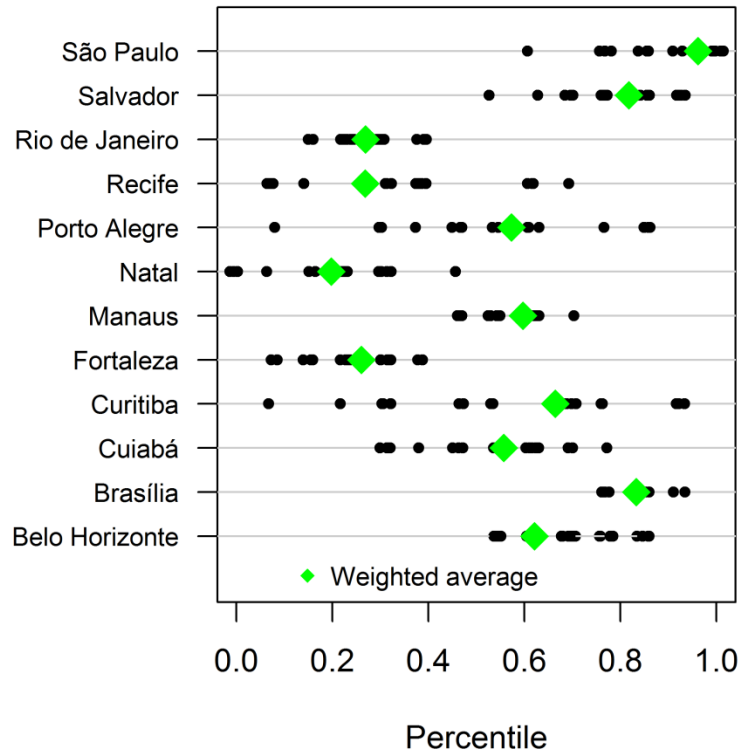

**Figure S1, Percentile of 2014 weekly IR's on distributions of previous years.** For each game city, the percentile of 2014 weeks 1 to 19 on the 2001-2013 distributions for the same weeks is shown (black) with some x-axis random variation to see the individual points. The average percentile weighted by the week number is shown in green (P2014).
