# Supplementary material for: Risk of Dengue for Tourists and Teams during the World Cup 2014 in Brazil
Source: PubMed Central journal article supplement (PMC4120682; doi:10.1371/journal.pntd.0003063), 2014-07-31
Supplement: pntd.0003063.s002.pdf [file pntd.0003063.s002.pdf]

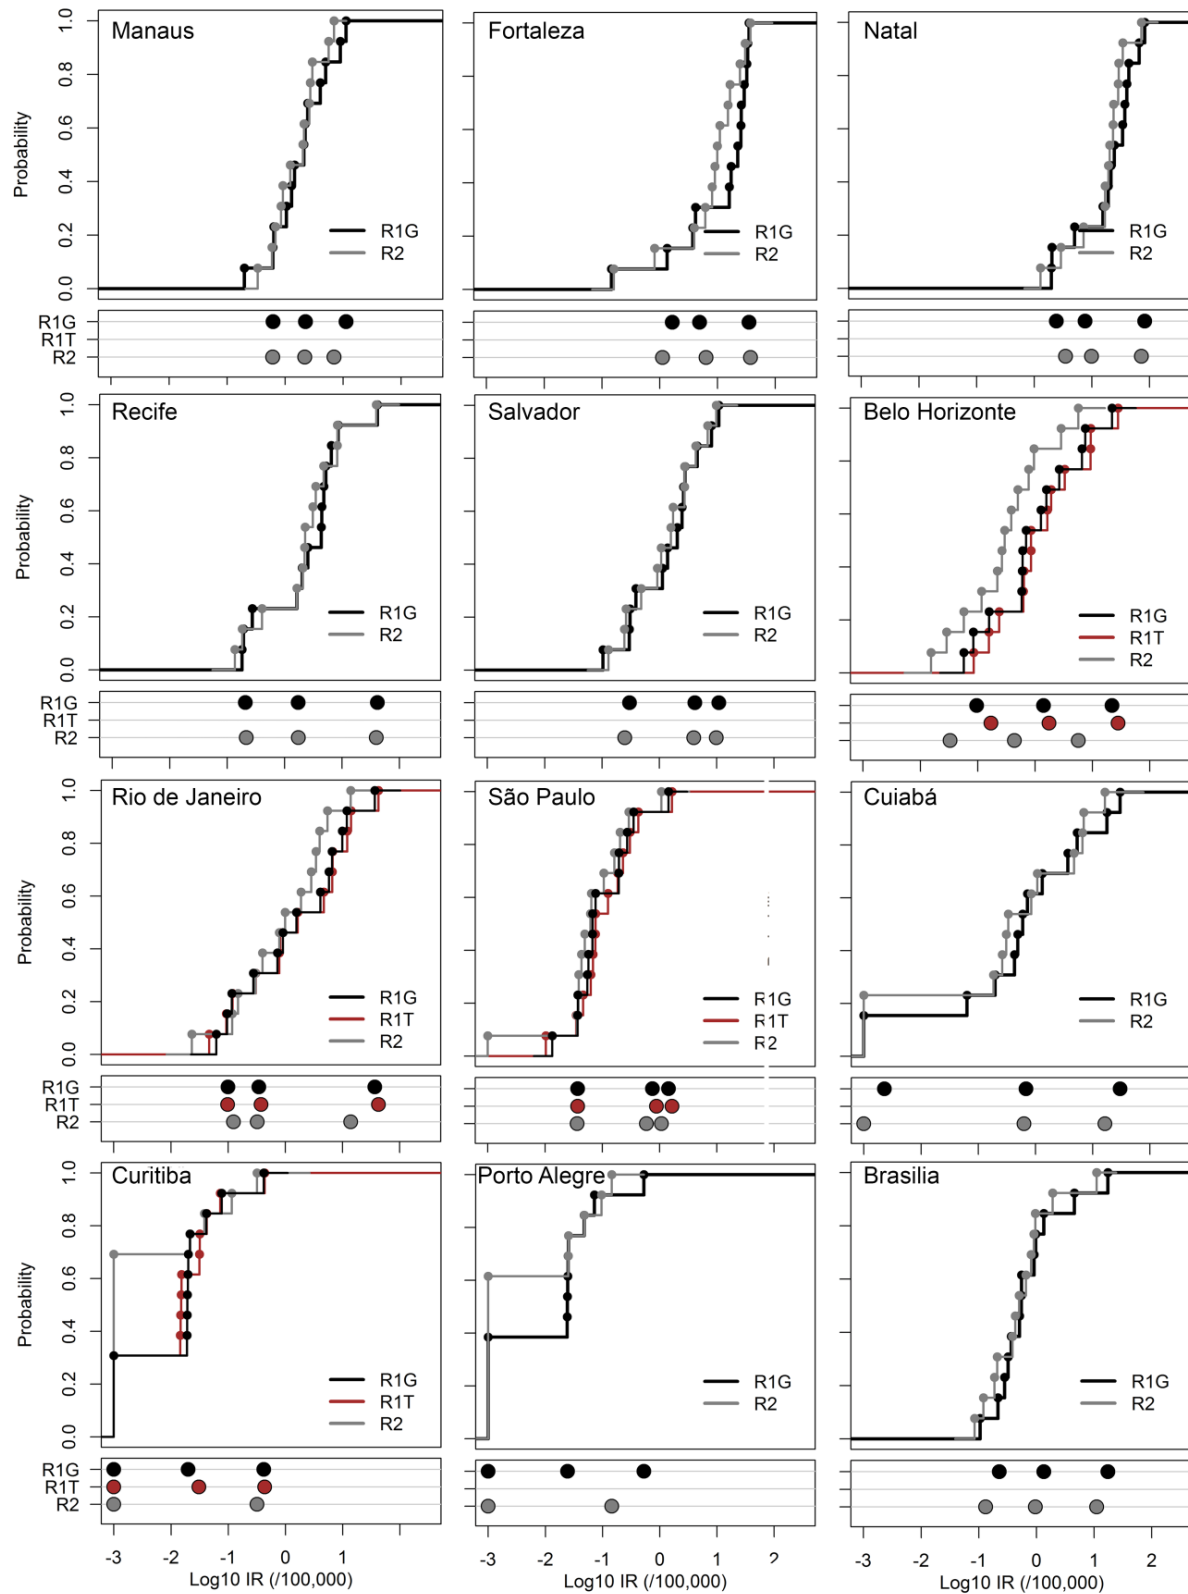

**Figure S2. Probability distribution of average log<sub>10</sub> incidence rates (/100,000) in game cities of the 2001-2013 period during the weeks of World Cup round one (teams: R1T and tourists: R1G) and round two (R2) of the 2014 World Cup. For each period, the 10<sup>th</sup> percentile (P10), P2014 and maximum are indicated.**
