# Supplementary material for: Risk of Dengue for Tourists and Teams during the World Cup 2014 in Brazil
Source: PubMed Central journal article supplement (PMC4120682; doi:10.1371/journal.pntd.0003063), 2014-07-31
Supplement: pntd.0003063.s005.pdf [file pntd.0003063.s005.pdf]

Table S1, Country teams and their game\* and basecamp locations

| <b>Country team</b>    | <b>Game 1</b>  | <b>Game 2</b>  | <b>Game 3</b>  | <b>Basecamp</b>                 |
|------------------------|----------------|----------------|----------------|---------------------------------|
| Algeria                | Curitiba       | Belo Horizonte | Porto Alegre   | Sorocaba                        |
| Argentina              | Belo Horizonte | Porto Alegre   | Rio de Janeiro | Vespasiano                      |
| Australia              | Curitiba       | Cuiabá         | Porto Alegre   | Vitória                         |
| Belgium                | Rio de Janeiro | Belo Horizonte | São Paulo      | Mogi das Cruzes                 |
| Bosnia and Herzegovina | Salvador       | Cuiabá         | Rio de Janeiro | Guarujá                         |
| Cameroon               | Manaus         | Natal          | Brasília       | Vitória                         |
| Chile                  | Rio de Janeiro | Cuiabá         | São Paulo      | Belo Horizonte                  |
| Colombia               | Cuiabá         | Brasília       | Belo Horizonte | Cotia                           |
| Costa Rica             | Fortaleza      | Belo Horizonte | Recife         | Santos                          |
| Cote d'Ivoire          | Recife         | Fortaleza      | Brasília       | Águas de Lindóia<br>Mata de São |
| Croatia                | São Paulo      | Manaus         | Recife         | João                            |
| Ecuador                | Curitiba       | Brasília       | Rio de Janeiro | Viamão                          |
| England                | São Paulo      | Manaus         | Belo Horizonte | Rio de Janeiro                  |
| France                 | Rio de Janeiro | Salvador       | Porto Alegre   | Ribeirão Preto<br>Santa Cruz    |
| Germany                | Recife         | Fortaleza      | Salvador       | Cabrália                        |
| Ghana                  | Fortaleza      | Natal          | Brasília       | Maceió                          |
| Greece                 | Natal          | Fortaleza      | Belo Horizonte | Aracaju                         |
| Honduras               | Porto Alegre   | Curitiba       | Manaus         | Porto Feliz                     |
| Iran                   | Belo Horizonte | Curitiba       | Salvador       | Guarulhos                       |
| Italy                  | Recife         | Natal          | Manaus         | Mangaratiba                     |
| Japan                  | Cuiabá         | Natal          | Recife         | Itu                             |
| Korea Republic         | São Paulo      | Cuiabá         | Porto Alegre   | Foz do Iguaçu                   |
| Mexico                 | Natal          | Fortaleza      | Recife         | Santos                          |
| Netherlands            | Porto Alegre   | Salvador       | São Paulo      | Rio de Janeiro                  |
| Nigeria                | Porto Alegre   | Cuiabá         | Curitiba       | Campinas                        |
| Portugal               | Manaus         | Brasília       | Salvador       | Campinas                        |
| Russia                 | Cuiabá         | Rio de Janeiro | Curitiba       | Itu                             |
| Spain                  | Salvador       | Rio de Janeiro | Curitiba       | Curitiba                        |
| Switzerland            | Manaus         | Brasília       | Salvador       | Porto Seguro                    |
| Uruguay                | São Paulo      | Natal          | Fortaleza      | Sete Lagoas                     |
| USA                    | Recife         | Manaus         | Natal          | São Paulo                       |

\* Game locations are only known for round one (qualifying round).
