# Supplementary material for: Risk of Dengue for Tourists and Teams during the World Cup 2014 in Brazil
Source: PubMed Central journal article supplement (PMC4120682; doi:10.1371/journal.pntd.0003063), 2014-07-31
Supplement: pntd.0003063.s006.pdf [file pntd.0003063.s006.pdf]

Table S2, Number of allocated tickets per country [1]

| <b>Country</b> | <b>Tickets</b> |
|----------------|----------------|
| USA            | 125,465        |
| Colombia       | 60,231         |
| Germany        | 55,666         |
| Argentina      | 53,809         |
| England        | 51,222         |
| Australia      | 40,446         |
| France         | 34,971         |
| Chile          | 32,189         |
| Mexico         | 30,238         |
| Total          | 484,237        |

## References

1. International Federation of Association Football (2014) 2.3 million tickets for the 2014 FIFA World Cup already allocated to fans. 21 Febr. Available: <http://www.fifa.com/worldcup/news/y=2014/m=2/news=million-tickets-for-the-2014-fifa-world-cuptm-already-allocated-fans-2281407.html>. Accessed 3 April 2014.
